# Supplementary material for: Viromics on Honey-Baited FTA Cards as a New Tool for the Detection of Circulating Viruses in Mosquitoes
Source: PubMed Central journal article supplement (PMC7150749; doi:10.3390/v12030274), 2020-02-29
Supplement: viruses-12-00274-s001.pdf [file viruses-12-00274-s001.pdf]

**Supplementary table 1:** Species composition and feeding rates on honey-baited FTA cards in peri-urban and rural biotopes from the Llobregat River Delta.

| MOSQUITO SPECIES                 | PERI-URBAN     |              |                  | RURAL          |              |                  | TOTAL |
|----------------------------------|----------------|--------------|------------------|----------------|--------------|------------------|-------|
|                                  | Total captured | No. of Pools | Blue Abdomen (%) | Total captured | No. of Pools | Blue Abdomen (%) |       |
| <i>Aedes albopictus</i>          | 0              | 0            | 0/0 (0)          | 20             | 10           | 12/20 (60.0)     | 20    |
| <i>Aedes caspius</i>             | 48             | 5            | 11/48 (22.9)     | 244            | 19           | 41/244 (16.8)    | 292   |
| <i>Aedes detritus</i>            | 0              | 0            | 0/0 (0)          | 2              | 1            | 0/0 (0)          | 2     |
| <i>Coquillettidia richiardii</i> | 0              | 0            | 0/0 (0)          | 11             | 5            | 8/11 (72.7)      | 11    |
| <i>Culex pipiens</i>             | 600            | 31           | 116/600 (19.3)   | 155            | 22           | 73/155 (47.1)    | 755   |

**Supplementary table 2:** Viral taxonomic assignments of assembled sequences associated to FTA cards linked to mosquito species during entomological surveys in Catalonia. Viral identities are expressed as protein and the taxonomic assignment refers to the virus/common ancestor of the best hits for all the contigs/singletons with the same score. Viral abundance was obtained by summing the length (in nucleotides) of all sequences being associated to this taxon, weighted by the *k-mer* coverage of each contig.

| Order  | Family         | Genus                             | Best hit                                       | Peri-urban                                    |                                | Rural           |                | Host             |                     |             |
|--------|----------------|-----------------------------------|------------------------------------------------|-----------------------------------------------|--------------------------------|-----------------|----------------|------------------|---------------------|-------------|
|        |                |                                   |                                                | % Identity (aa)                               | Abundance (nt)                 | % Identity (aa) | Abundance (nt) |                  |                     |             |
| ssRNA+ | Picornavirales | Dicistroviridae                   | Aparavirus                                     | Kashmir bee virus                             | 52-100%                        | 3476802         | 55-100%        | 4231521          | Hymenoptera         |             |
|        |                |                                   |                                                | Israeli acute paralysis virus                 | -                              | -               | 56-95%         | 123149           | Hymenoptera         |             |
|        |                |                                   |                                                | Acute bee paralysis virus                     | 69-75%                         | 37594           | 64-100%        | 13317            | Hymenoptera         |             |
|        |                |                                   | Triatovirus                                    | unassigned <i>Aparavirus</i>                  | 83-100%                        | 221821          | 86-100%        | 378477           |                     |             |
|        |                |                                   |                                                | Black queen cell virus                        | 46-100%                        | 1612911         | 63-100%        | 2224831          | Hymenoptera         |             |
|        |                |                                   |                                                | <i>Triatoma</i> virus                         | -                              | -               | 52-76%         | 5666             | Hemiptera           |             |
|        |                |                                   | Cripavirus                                     | Aphid lethal paralysis virus                  | 66-100%                        | 104687          | 67-100%        | 55235            | Hymenoptera         |             |
|        |                |                                   |                                                | <i>Rhopalosiphum padi</i> virus               | -                              | -               | 92-100%        | 2607             | Hemiptera           |             |
|        |                |                                   | Unclassified                                   | Human blood associates <i>Dicistroviridae</i> | 51-88%                         | 30762           | 74%            | 1914             | <i>Homo sapiens</i> |             |
|        |                |                                   |                                                | Blackberry virus Z                            | -                              | -               | 66-68%         | 939              | Plant               |             |
|        |                | Bivalve RNA virus G5              |                                                | 38%                                           | 23460                          | -               | -              | Mollusca         |                     |             |
|        |                | <i>Formica exsecta</i> virus 1    |                                                | -                                             | -                              | 75-76%          | 354            | Hymenoptera      |                     |             |
|        |                | unassigned <i>Dicistroviridae</i> |                                                | 73-100%                                       | 17978                          | 80-100%         | 26396          | -                |                     |             |
|        |                | Iflaviridae                       |                                                | Iflavirus                                     | Deformed wing virus            | 66-100%         | 2468142        | 64-100%          | 1886897             | Hymenoptera |
|        |                |                                   |                                                |                                               | <i>Formica exsecta</i> virus 2 | -               | -              | 43%              | 15081               | Hymenoptera |
|        |                |                                   |                                                | Sacbrood virus                                | 53-100%                        | 361302          | 51-100%        | 593255           | Hymenoptera         |             |
|        |                |                                   | unassigned <i>Iflavirus</i>                    | 28-100%                                       | 739318                         | 72-100%         | 740894         | -                |                     |             |
|        |                | Unclassified                      | Culex iflavi-like virus 4                      | 97-100%                                       | 168154                         | 71-100%         | 1009175        | <i>Culex</i> sp. |                     |             |
|        |                |                                   | Culex iflavi-like virus 3                      | 48-74%                                        | 6342                           | -               | -              | <i>Culex</i> sp. |                     |             |
|        |                |                                   | <i>Tribolium castaneum</i> iflavirus           | 40%                                           | 42696                          | 28-73%          | 31272          | Coleoptera       |                     |             |
|        |                |                                   | <i>Pityohyphantes rubrofasciatus</i> iflavirus | -                                             | -                              | 55-87%          | 14170          | Arachnida        |                     |             |
|        |                |                                   | other unclassified <i>Iflaviridae</i>          | 70-100%                                       | 9183                           | 41-100%         | 5583           | -                |                     |             |
|        |                |                                   | Secoviridae                                    | Nepovirus                                     | Red clover nepovirus A         | -               | -              | 62%              | 17857               | Plant       |
|        |                | <i>Arabis</i> mosaic virus        |                                                |                                               | 61-100%                        | 2294            | 96-100%        | 2227             | Plant               |             |
|        |                | Grapevine Bulgarian latent virus  |                                                |                                               | -                              | -               | 81-90%         | 966              | Plant               |             |
|        |                |                                   |                                                |                                               |                                |                 |                |                  |                     |             |

|                    |                        |                         |                                                        |         |        |         |         |                       |
|--------------------|------------------------|-------------------------|--------------------------------------------------------|---------|--------|---------|---------|-----------------------|
|                    |                        |                         | Grapevine chrome mosaic virus                          | -       | -      | 43-75%  | 828     | Plant                 |
|                    |                        |                         | unassigned <i>Nepovirus</i>                            | -       | -      | 56-93%  | 8998    | -                     |
|                    |                        | <i>Fabavirus</i>        | Prunus virus F                                         | -       | -      | 61%     | 141     | Plant                 |
|                    | <i>Polycipiviridae</i> | unclassified            | <i>Linepithema humile</i> polycipivirus 2              | 100%    | 600    | -       | -       | Hymenoptera           |
|                    | <i>Picornaviridae</i>  | <i>Enterovirus</i>      | Rhinovirus C                                           | -       | -      | 98-100% | 441     | <i>Homo sapiens</i>   |
|                    |                        | <i>Sapelovirus</i>      | Sapelovirus A                                          | 55-100% | 579    | -       | -       | Vertebrates           |
|                    | Unclassified           |                         | <i>Culex</i> picorna-like virus 1                      | 77-100% | 102979 | 64-100% | 806998  | <i>Culex</i> sp.      |
|                    | <i>Picornavirales</i>  |                         |                                                        |         |        |         |         |                       |
|                    |                        |                         | Bundaberg bee virus 6                                  | -       | -      | 50-88%  | 7355    | Hymenoptera           |
|                    |                        |                         | Bundaberg bee virus 2                                  | 53-93%  | 92769  | 52-96%  | 6140    | Hymenoptera           |
|                    |                        |                         | Victoria bee virus 1                                   | 53-100% | 74634  | 77-100% | 6562    | Hymenoptera           |
|                    |                        |                         | Victoria bee virus 2                                   | 55-100% | 12927  | 58-100% | 6298    | Hymenoptera           |
|                    |                        |                         | Hobart bee virus 1                                     | -       | -      | 48-97%  | 4653    | Hymenoptera           |
|                    |                        |                         | Darwin bee virus 7                                     | -       | -      | 83-100% | 5554    | Hymenoptera           |
|                    |                        |                         | Darwin bee virus 3                                     | 44-95%  | 35457  | 44-80%  | 13695   | Hymenoptera           |
|                    |                        |                         | unassigned <i>Picornavirales</i>                       | 33-100% | 68703  | 49-100% | 1299417 | -                     |
| <i>Nidovirales</i> | <i>Mesoniviridae</i>   | <i>Alphamesonivirus</i> | Alphamesonivirus 1                                     | 60-100% | 22590  | 53-100% | 3606196 | Mosquitoes            |
|                    |                        |                         | Alphamesonivirus 2/ Karang Sari virus                  | -       | -      | 51-86%  | 4092    | <i>Culex</i> sp.      |
|                    |                        |                         | Alphamesonivirus 3/ Dak Nong virus                     | -       | -      | 70-89%  | 1770    | <i>Culex</i> sp.      |
|                    |                        |                         | Alphamesonivirus 4/ Casuarina virus                    | -       | -      | 59-100% | 2289    | <i>Coquillettidia</i> |
|                    |                        |                         | Alphamesonivirus 5/ Hanalivirus                        | -       | -      | 55-100% | 11157   | <i>Culex</i> sp.      |
|                    |                        |                         | Alphamesonivirus 8/ Nse virus                          | -       | -      | 86%     | 750     | <i>Culex</i> sp.      |
|                    |                        |                         | Alphamesonivirus 9/ Meno virus                         | -       | -      | 56-81%  | 7770    | <i>Uranotaenia</i>    |
|                    |                        |                         | unassigned <i>Alphamesonivirus</i>                     | 69-100% | 2118   | 65-100% | 77128   | -                     |
|                    |                        | unclassified            | Dianke virus                                           | 74-100% | 22939  | -       | -       | Rodentia              |
|                    |                        |                         | unassigned <i>Mesoniviridae</i>                        | 98-100% | 4364   | -       | -       | -                     |
|                    | unclassified           | -                       | -                                                      | -       | -      | 90-100% | 538375  | -                     |
|                    | <i>Nidovirales</i>     |                         |                                                        |         |        |         |         |                       |
| <i>Tymovirales</i> | <i>Tymoviridae</i>     | <i>Marafivirus</i>      | Grapevine rupestris vein feathering virus              | 56-88%  | 53914  | 77-84%  | 7359    | Plant                 |
|                    |                        |                         | Olive latent virus 3                                   | 68%     | 23922  | -       | -       | Plant                 |
|                    |                        |                         | Citrus sudden death-associated virus                   | 52-83%  | 55460  | -       | -       | Plant                 |
|                    |                        | <i>Maculavirus</i>      | Bee macula-like virus 2                                | 36-73%  | 266050 | -       | -       | Hymenoptera           |
|                    |                        |                         | Grapevine red globe virus                              | 41-85%  | 371176 | -       | -       | Plant                 |
|                    |                        |                         | <i>Culex</i> originated <i>Tymoviridae</i> -like virus | 40-51%  | 644699 | -       | -       | <i>Culex</i> sp.      |
|                    |                        |                         | Grapevine fleck virus                                  | 53%     | 13259  | -       | -       | Plant                 |

|   |                          |                     |                                              |                                   |         |         |        |                           |                  |
|---|--------------------------|---------------------|----------------------------------------------|-----------------------------------|---------|---------|--------|---------------------------|------------------|
|   |                          |                     | Fig fleck-associated virus                   | 48%                               | 7344    | -       | -      | Plant                     |                  |
|   |                          | <i>Tymovirus</i>    | <i>Erysimum</i> latent virus                 | 47-76%                            | 74318   | -       | -      | Plant                     |                  |
|   |                          |                     | unclassified <i>Tymovirus</i>                | 50-88%                            | 1032    | -       | -      | -                         |                  |
|   |                          | unclassified        | Bee macula-like virus                        | 44-61%                            | 9155    | -       | -      | Hymenoptera               |                  |
|   |                          |                     | <i>Varroa</i> tymo-like virus                | 66-68%                            | 462     | -       | -      | Arachnida                 |                  |
|   |                          |                     | Naranjilla chlorotic mosaic virus            | 47-67%                            | 10488   | -       | -      | Plant                     |                  |
|   |                          |                     | unassigned <i>Tymoviridae</i>                | 41-67%                            | 75753   | -       | -      | -                         |                  |
|   | <i>Alphaflexiviridae</i> | <i>Potexvirus</i>   | Pepino mosaic virus                          | 69-100%                           | 1957    | 70-100% | 1881   | Plant                     |                  |
|   |                          |                     | White clover mosaic virus                    | -                                 | -       | 96-100% | 333    | Plant                     |                  |
|   | <i>Betaflexiviridae</i>  | <i>Prunovirus</i>   | <i>Caucasus prunus</i> virus                 | -                                 | -       | 75-91%  | 576    | Plant                     |                  |
|   |                          | <i>Carlavirus</i>   | Narine latent virus                          | -                                 | -       | 70-96%  | 306    | Plant                     |                  |
|   | unclassified             |                     | Bat tymo-like virus                          | 41-88%                            | 38435   | -       | -      | Vertebrate                |                  |
|   | <i>Tymovirales</i>       |                     | other unclassified <i>Tymovirales</i>        | 54-94%                            | 756     | -       | -      | -                         |                  |
| - |                          | <i>Flaviviridae</i> | <i>Flavivirus</i>                            | Quang Binh virus                  | -       | -       | 55%    | 135                       | <i>Culex</i> sp. |
|   |                          |                     | Calbertado virus                             | 47-86%                            | 10176   | -       | -      | <i>Culex</i> sp.          |                  |
|   |                          |                     | West Nile virus                              | 59-92%                            | 672     | -       | -      | Invertebrates/vertebrates |                  |
|   |                          |                     | Meaban virus                                 | 72-100%                           | 600     | -       | -      | Invertebrates/vertebrates |                  |
|   |                          | Unclassified        | Xishuangbanna <i>Aedes</i> flavivirus        | -                                 | -       | 81%     | 282    | <i>Aedes</i>              |                  |
|   |                          |                     | Karumba virus                                | 49%                               | 96687   | -       | -      | <i>Anopheles</i>          |                  |
|   |                          |                     | unassigned <i>Flaviviridae</i>               | -                                 | -       | 66-83%  | 204    | -                         |                  |
| - |                          | <i>Virgaviridae</i> | <i>Hordeivirus</i>                           | <i>Lychnis</i> ringspot virus     | 49-97%  | 46711   | 45-82% | 17047                     | Plant            |
|   |                          |                     | <i>Tobamovirus</i>                           | unclassified <i>Tobamovirus</i>   | 78-100% | 6443    | 73-98% | 19826                     | -                |
| - |                          | <i>Narnaviridae</i> | <i>Narnavirus</i>                            | <i>Fusarium poae</i> narnavirus 2 | -       | -       | 50-64% | 7859                      | Fungi            |
|   |                          |                     | <i>Aspergillus fumigatus</i> narnavirus 2    | -                                 | -       | 68-88%  | 4930   | Fungi                     |                  |
|   |                          |                     | <i>Aspergillus fumigatus</i> narnavirus 1    | -                                 | -       | 63%     | 2614   | Fungi                     |                  |
|   |                          | <i>Mitovirus</i>    | <i>Sclerotinia sclerotiorum</i> mitovirus 27 | 49-57%                            | 1688    | -       | -      | Fungi                     |                  |
|   |                          |                     | <i>Rhizoctonia solani</i> mitovirus 6        | 60-67%                            | 1677    | -       | -      | Fungi                     |                  |
|   |                          |                     | <i>Erysiphe necator</i> mitovirus 3          | 58-75%                            | 1599    | -       | -      | Fungi                     |                  |
|   |                          |                     | <i>Ambrosia artemisiifolia</i> mitovirus 1   | 45-70%                            | 2482    | -       | -      | Plant                     |                  |
|   |                          |                     | unclassified <i>Mitovirus</i>                | -                                 | -       | 45-87%  | 1428   | -                         |                  |
|   |                          | unclassified        | <i>Phomopsis longicolla</i> RNA virus 1      | 58-74%                            | 396     | -       | -      | Fungi                     |                  |
|   |                          |                     | other unclassified <i>Narnaviridae</i>       | 48-97%                            | 4724    | -       | -      | -                         |                  |
| - |                          | <i>Sinaivirus</i>   | Lake Sinai virus 1                           | 90-91%                            | 4183    | 94-100% | 11620  | Hymenoptera               |                  |

|               |                     |                         |                       |                                                                    |         |         |         |        |                         |
|---------------|---------------------|-------------------------|-----------------------|--------------------------------------------------------------------|---------|---------|---------|--------|-------------------------|
|               |                     |                         |                       | Lake Sinai virus                                                   | 61-100% | 4528    | -       | -      | Hymenoptera             |
|               |                     |                         | <i>Ourmiavirus</i>    | <i>Rhizoctonia solani</i> ourmia-like virus 1 RNA 1                | -       | -       | 56-62%  | 924    | Fungi                   |
|               |                     |                         |                       | <i>Magnaporthe oryzae</i> ourmia-like virus                        | 52-69%  | 576     | -       | -      | Fungi                   |
|               |                     |                         | <i>Negevirus</i>      | Dezidougou virus                                                   | 85-100% | 1424472 | 87-100% | 9366   | <i>Aedes</i>            |
|               |                     |                         |                       | Negevirus nona 1                                                   | 49-95%  | 190830  | -       | -      | <i>Aedes</i>            |
|               |                     | <i>Luteoviridae</i>     | <i>Polerovirus</i>    | Cucurbit aphid-borne yellows virus                                 | 64-98%  | 735     | -       | -      | Plant                   |
|               |                     |                         | Unclassified          | Culex-associated luteo-like virus                                  | -       | -       | 67-100% | 3285   | <i>Culex</i> sp.        |
|               |                     | <i>Potyviridae</i>      | <i>Ipomovirus</i>     | Cucumber vein yellowing virus                                      | -       | -       | 100%    | 588    | Plant                   |
|               |                     |                         | <i>Potyvirus</i>      | Potato virus Y                                                     | 89-98%  | 303     | -       | -      | Plant                   |
|               |                     | <i>Solemoviridae</i>    | <i>Sobemovirus</i>    | Sowbane mosaic virus                                               | -       | -       | 98-100% | 444    | Plant                   |
|               |                     |                         | Unclassified          | Bat sobemovirus                                                    | -       | -       | 60-100% | 1917   | Vertebrate              |
|               |                     | <i>Closteroviridae</i>  | <i>Closterovirus</i>  | Citrus tristeza virus                                              | 62-96%  | 342     | 75-99%  | 4164   | Plant                   |
|               |                     | <i>Tombusviridae</i>    | <i>Umbravirus</i>     | <i>Sclerotinia sclerotiorum</i> umbra-like virus 3                 | -       | -       | 63%     | 2220   | Fungi                   |
|               |                     |                         | Unclassified          | Culex-associated tombus-like virus unassigned <i>Tombusviridae</i> | -       | -       | 94-100% | 777    | <i>Culex</i> sp.        |
|               |                     |                         |                       | unassigned <i>Tombusviridae</i>                                    | 65-100% | 837     | -       | -      | -                       |
|               |                     | <i>Bromoviridae</i>     | <i>Ilarvirus</i>      | <i>Ageratum</i> latent virus                                       | -       | -       | 90-95%  | 1269   | Plant                   |
|               |                     |                         |                       | <i>Parietaria</i> mottle virus                                     | -       | -       | 80-93%  | 1203   | Plant                   |
|               |                     |                         |                       | <i>Fragaria chiloensis</i> latent virus                            | -       | -       | 63-75%  | 1143   | Plant                   |
|               |                     |                         |                       | unassigned <i>Ilarvirus</i>                                        | -       | -       | 74      | 292    | -                       |
|               |                     |                         |                       | Tomato necrotic spot virus                                         | 80%     | 6906    | -       | -      | Plant                   |
|               |                     |                         | <i>Alfamovirus</i>    | Alfalfa mosaic virus                                               | -       | -       | 86-98%  | 405    | Plant                   |
|               |                     |                         | <i>Anulavirus</i>     | <i>Pelargonium zonate</i> spot virus                               | 39-92%  | 18444   | -       | -      | Plant                   |
|               |                     | <i>Nodaviridae</i>      | <i>Alphanodavirus</i> | Pariacoto virus                                                    | 51-53%  | 2238    | -       | -      | Lepidoptera             |
|               |                     |                         |                       | unassigned <i>Alphanodavirus</i>                                   | -       | -       | 85-87%  | 1262   | -                       |
|               |                     |                         | <i>Betanodavirus</i>  | Wuhan nodavirus                                                    | -       | -       | 63%     | 147    | Lepidoptera             |
|               |                     |                         | Unclassified          | Culex mosquito virus 1                                             | -       | -       | 81-100% | 1709   | <i>Culex</i> sp.        |
|               |                     |                         |                       | Culex mosquito virus 4                                             | 91-100% | 3651    | -       | -      | <i>Culex</i> sp.        |
|               |                     |                         |                       | Culex Hubei-like virus                                             | 85-100% | 5142    | -       | -      | <i>Culex</i> sp.        |
|               |                     |                         |                       | other unclassified <i>Nodaviridae</i>                              | 50-100% | 6063    | 75-100% | 765    | -                       |
|               |                     | Unclassified ssRNA+     | -                     | HVAC-associated RNA virus 1                                        | -       | -       | 48-76%  | 154674 | Environmental/<br>human |
|               |                     |                         |                       | <i>Culex pipiens</i> associated Tunisia virus                      | 96-100% | 11319   | 75-100% | 3924   | <i>Culex</i> sp.        |
|               |                     |                         |                       | Chronic bee paralysis virus                                        | -       | -       | 83-100% | 7300   | Hymenoptera             |
|               |                     |                         |                       | other unclassified ssRNA+ viruses                                  | 50-100% | 5807    | 44-100% | 12887  | -                       |
| <b>ssRNA-</b> | <i>Bunyavirales</i> | <i>Peribunyaviridae</i> | Unclassified          | Seattle Prectang virus                                             | -       | -       | 38-56%  | 5358   | Lepidoptera             |

|  |                        |                         |                                                |         |        |         |        |                       |
|--|------------------------|-------------------------|------------------------------------------------|---------|--------|---------|--------|-----------------------|
|  |                        |                         | <i>Apis</i> bunyavirus 2                       | -       | -      | 46-65%  | 2900   | Hymenoptera           |
|  |                        |                         | Ganda bee virus                                | 35-95%  | 174507 | 60-66%  | 660    | Hymenoptera           |
|  |                        | <i>Orthobunyavirus</i>  | Buttonwillow virus                             | -       | -      | 61-69%  | 294    | Culicoides/vertebrate |
|  | <i>Phasmaviridae</i>   | <i>Orthophasmavirus</i> | Wuchang cockroach virus 1                      | 50%     | 114    | 39-80%  | 13185  | Blattodea             |
|  |                        | <i>Inshuvirus</i>       | Shuangao insect virus 2                        | -       | -      | 77-91%  | 1623   | Lepidoptera           |
|  | <i>Phenuiviridae</i>   | <i>Phasivirus</i>       | Phasi Charoen-like phasivirus                  | -       | -      | 58-77%  | 690    | <i>Aedes</i>          |
|  |                        | <i>Phlebovirus</i>      | Laurel Lake virus                              | -       | -      | 54%     | 373    | Arachnida             |
|  |                        | <i>Goukovirus</i>       | Cumuto virus                                   | -       | -      | 61%     | 123    | <i>Culex</i> sp.      |
|  |                        | <i>Hudovirus</i>        | Hubei lepidoptera virus 1                      | 86%     | 132    | -       | -      | Lepidoptera           |
|  |                        | Unclassified            | Citrus concave gum-associated virus            | -       | -      | 46%     | 428    | Plant                 |
|  | Unclassified           | <i>Bunyavirales</i>     | <i>Bunyaviridae</i> environmental sample       | 95-98%  | 294    | 48-99%  | 335292 | <i>Culex</i> sp.      |
|  |                        |                         | <i>Culex</i> bunya-like virus                  | 85-100% | 1806   | 47-100% | 289007 | <i>Culex</i> sp.      |
|  |                        |                         | Yongsan bunyavirus 1                           | 46%     | 135    | -       | -      | <i>Aedes</i>          |
|  |                        |                         | unassigned <i>Bunyavirales</i>                 | -       | -      | 73-100% | 213787 | -                     |
|  | <i>Articulavirales</i> | <i>Orthomyxoviridae</i> | <i>Quaranjavirus</i>                           |         |        |         |        |                       |
|  |                        |                         | Jingshan fly virus 1                           | -       | -      | 49-80%  | 8938   | <i>Muscidae</i>       |
|  |                        |                         | Wuhan mosquito virus 5                         | -       | -      | 50%     | 5460   | <i>Culex</i> sp.      |
|  |                        |                         | Wuhan mosquito virus 6                         | 72-100% | 9480   | 45-87%  | 7813   | <i>Culex</i> sp.      |
|  |                        |                         | Wuhan mosquito virus 7                         | 53-100% | 43351  | -       | -      | <i>Anopheles</i>      |
|  |                        |                         | other unclassified <i>Quaranjavirus</i>        | -       | -      | 60-100% | 618    | -                     |
|  |                        | Unclassified            | <i>Photinus pyralis</i> orthomyxo-like virus 1 | -       | -      | 27%     | 4445   | Coleoptera            |
|  |                        |                         | <i>Photinus pyralis</i> orthomyxo-like virus 2 | -       | -      | 38%     | 7165   | Coleoptera            |
|  | <i>Mononegavirales</i> | <i>Rhabdoviridae</i>    | <i>Hapavirus</i>                               |         |        |         |        |                       |
|  |                        |                         | Joinjakaka virus                               | -       | -      | 54-68%  | 276    | <i>Culicinae</i> sp.  |
|  |                        |                         | Marco virus                                    | 54-60%  | 453    | -       | -      | Vertebrate            |
|  |                        | <i>Ephemerovirus</i>    | Yata virus                                     | -       | -      | 51%     | 147    | <i>Mansonia</i>       |
|  |                        |                         | Obodhiang virus                                | 55-72%  | 414    | -       | -      | <i>Mansonia</i>       |
|  |                        | <i>Ledantevirus</i>     | Keuraliba virus                                | -       | -      | 65%     | 123    | Rodentia              |
|  |                        |                         | Kern Canyon virus                              | 48-52%  | 309    | -       | -      | Chiroptera/vertebrate |
|  |                        |                         | <i>Sigmavirus</i>                              | 61-82%  | 1107   | -       | -      | -                     |
|  |                        |                         | <i>Tibrovirus</i>                              | 60-76%  | 693    | -       | -      | Culicoides            |
|  |                        | unclassified            | unclassified <i>Rhabdoviridae</i>              | -       | -      | 68-72%  | 1194   | -                     |
|  |                        |                         | <i>Apis</i> rhabdovirus 1                      | 45-100% | 1719   | -       | -      | Hymenoptera           |
|  | unclassified           | <i>Anphevirus</i>       | <i>Aedes</i> anphevirus                        | 68%     | 135    | 68%     | 144    | <i>Aedes</i>          |

|              |                       |                                        |                                                  |         |       |         |        |                       |
|--------------|-----------------------|----------------------------------------|--------------------------------------------------|---------|-------|---------|--------|-----------------------|
|              |                       | unclassified<br><i>Mononegavirales</i> | unassigned <i>Mononegavirales</i>                | 58-77%  | 237   | -       | -      | -                     |
|              | <i>Jingchuvirales</i> | <i>Chuviridae</i>                      | <i>Mivirus</i>                                   |         |       |         |        |                       |
|              |                       | unclassified<br>ssRNA-                 | Wuhan louse fly virus 6                          | -       | -     | 56-81%  | 3844   | <i>Hippoboscidae</i>  |
|              |                       |                                        | Wuhan louse fly virus 2                          | -       | -     | 55%     | 348    | <i>Hippoboscoidea</i> |
|              |                       |                                        | Wuhan louse fly virus 11                         | 61%     | 126   | -       | -      | <i>Hippoboscidae</i>  |
|              |                       |                                        | other unclassified ssRNA- viruses                | -       | -     | 76%     | 552    | -                     |
| <b>dsRNA</b> | <i>Partitiviridae</i> | <i>Alphapartitivirus</i>               | Pear alphapartitivirus                           | 74-98%  | 26487 | 53-98%  | 299705 | Plant                 |
|              |                       |                                        | <i>Medicago sativa</i> alphapartitivirus 1       | 52-100% | 14146 | -       | -      | Plant                 |
|              |                       |                                        | <i>Helicobasidium mompa</i> partitivirus V1-1    | -       | -     | 59-86%  | 67113  | Fungi                 |
|              |                       |                                        | unclassified <i>Alphapartitivirus</i>            | -       | -     | 75-98%  | 10637  | -                     |
|              |                       | <i>Betapartitivirus</i>                | White clover cryptic virus 2                     | 73-100% | 2880  | 82-100% | 159048 | Plant                 |
|              |                       |                                        | Crimson clover cryptic virus 2                   | 77-100% | 3459  | 56-100% | 50325  | Plant                 |
|              |                       |                                        | <i>Pleurotus ostreatus</i> virus 1               | -       | -     | 61-80%  | 8364   | Fungi                 |
|              |                       |                                        | unclassified <i>Betapartitivirus</i>             | 52-100% | 4341  | 92%     | 11143  | -                     |
|              |                       | <i>Deltapartitivirus</i>               | Spinach deltapartitivirus 1                      | 69-86%  | 21810 | 57-92%  | 6453   | Plant                 |
|              |                       |                                        | Pepper cryptic virus 2                           | 53-77%  | 3828  | 56-77%  | 3384   | Plant                 |
|              |                       |                                        | Fig cryptic virus                                | 59-84%  | 9072  | 63-80%  | 4075   | Plant                 |
|              |                       |                                        | Beet cryptic virus 2                             | 70-84%  | 4311  | 64-82%  | 2193   | Plant                 |
|              |                       |                                        | Pepper cryptic virus 1                           | -       | -     | 60-89%  | 3693   | Plant                 |
|              |                       |                                        | unclassified <i>Deltapartitivirus</i>            | 56-96%  | 2817  | 72-77%  | 2465   | -                     |
|              |                       | <i>Gammapartitivirus</i>               | <i>Fusarium solani</i> virus 1                   | 61-87%  | 1107  | -       | -      | Fungi                 |
|              |                       |                                        | <i>Ophiostoma</i> partitivirus 1                 | -       | -     | 94-96%  | 357    | Fungi                 |
|              |                       | unclassified                           | Rose partitivirus                                | 65-97%  | 7961  | 55-100% | 321156 | Plant                 |
|              |                       |                                        | <i>Pittosporum</i> cryptic virus-1               | 57-96%  | 5668  | -       | -      | Plant                 |
|              |                       |                                        | <i>Raphanus sativus</i> cryptic virus 3          | 48-85%  | 3687  | -       | -      | Plant                 |
|              |                       |                                        | Persimmon cryptic virus                          | 67-79%  | 3063  | -       | -      | Plant                 |
|              |                       |                                        | <i>Linepithema humile</i> partiti-like virus 1   | -       | -     | 69-100% | 195870 | Hymenoptera           |
|              |                       |                                        | <i>Podosphaera prunicola</i> partitivirus 4      | -       | -     | 44-78%  | 25768  | Fungi                 |
|              |                       |                                        | other unclassified <i>Partitiviridae</i>         | 46-100% | 13507 | 49-100% | 79693  | -                     |
|              | <i>Totiviridae</i>    | <i>Totivirus</i>                       | <i>Saccharomyces cerevisiae</i> virus L-A-lus    | -       | -     | 47-90%  | 887016 | Fungi                 |
|              |                       |                                        | <i>Saccharomyces cerevisiae</i> virus L-A        | 49-87%  | 8727  | -       | -      | Fungi                 |
|              |                       |                                        | <i>Scheffersomyces segobiensis</i> virus L       | 51-92%  | 2439  | 36-88%  | 42633  | Fungi                 |
|              |                       |                                        | unclassified <i>Totivirus</i>                    | 52-89%  | 1191  | 49-68%  | 3183   | -                     |
|              |                       | unclassified                           | <i>Pterostylis sanguinea</i> totivirus A         | 54-95%  | 3489  | 66-97%  | 268125 | Plant                 |
|              |                       |                                        | <i>Saccharomyces kudriavzevii</i> virus L-A-1082 | 64-96%  | 3120  | 46-100% | 45147  | Fungi                 |

|                               |                          |                                               |         |       |         |       |                      |
|-------------------------------|--------------------------|-----------------------------------------------|---------|-------|---------|-------|----------------------|
|                               |                          | <i>Saccharomyces paradoxus</i> virus L-A-4650 | -       | -     | 53-56%  | 25000 | Fungi                |
|                               |                          | <i>Saccharomyces paradoxus</i> virus L-A-45   | 42-89%  | 11412 | 47-85%  | 9434  | Fungi                |
|                               |                          | <i>Saccharomyces kudriavzevii</i> virus L-A1  | -       | -     | 60-74%  | 7425  | Fungi                |
|                               |                          | <i>Saccharomyces uvarum</i> virus L-A-10560   | -       | -     | 55-78%  | 3957  | Fungi                |
|                               |                          | <i>Camponotus nipponicus</i> virus            | 29%     | 11361 | -       | -     | Hymenoptera          |
|                               |                          | <i>Camponotus yamaokai</i> virus              | 56%     | 3780  | -       | -     | Hymenoptera          |
|                               |                          | other unclassified <i>Totiviridae</i>         | 41-97%  | 19816 | 55-71%  | 19494 | -                    |
| <i>Endornaviridae</i>         | <i>Alphaendornavirus</i> | <i>Phaseolus vulgaris</i> alphaendornavirus 2 | 42-73%  | 13314 | 38-78%  | 10353 | Plant                |
|                               |                          | <i>Helianthus annuus</i> alphaendornavirus    | 54%     | 3996  | -       | -     | Plant                |
|                               |                          | <i>Persea americana</i> alphaendornavirus 1   | -       | -     | 54-100% | 16536 | Plant                |
|                               |                          | Bell pepper alphaendornavirus                 | 41-100% | 3693  | -       | -     | Plant                |
|                               |                          | Grapevine endophyte<br>alphaendornavirus      | 68-100% | 3648  | -       | -     | Plant                |
|                               |                          | Winged bean alphaendornavirus 1               | 36-90%  | 7604  | 46-88%  | 4077  | Plant                |
|                               |                          | unclassified <i>Alphaendornavirus</i>         | 34-100% | 7899  | 42-100% | 7716  | -                    |
|                               | unclassified             | <i>Phaseolus vulgaris</i> endornavirus 3      | 64-87%  | 2377  | 62-83%  | 3714  | Plant                |
|                               |                          | <i>Ceratobasidium</i> endornavirus G          | 43%     | 2133  | -       | -     | Fungi                |
|                               |                          | <i>Rhizoctonia solani</i> endornavirus 1      | 60%     | 1881  | -       | -     | Fungi                |
|                               |                          | other unclassified <i>Endornaviridae</i>      | 47-95%  | 1125  | -       | -     | -                    |
| <i>Picobirnaviridae</i>       | unclassified             | unclassified <i>Picobirnaviridae</i>          | 60-87%  | 2550  | 48-100% | 15021 | -                    |
| <i>Chrysoviridae</i>          | <i>Chrysovirus</i>       | <i>Persea americana</i> chrysovirus           | 86-100% | 1023  | 57-100% | 1607  | Plant                |
| <i>Hypoviridae</i>            | unclassified             | <i>Sclerotinia sclerotiorum</i> hypovirus 3   | -       | -     | 76-100% | 1170  | Fungi                |
|                               |                          | unclassified <i>Hypoviridae</i>               | 92-100% | 597   | -       | -     | -                    |
| <i>Amalgaviridae</i>          | unclassified             | Rubber dandelion latent virus 2               | -       | -     | 61-63%  | 354   | Plant                |
|                               |                          | unclassified <i>Amalgaviridae</i>             | 63-86%  | 468   | -       | -     | -                    |
| <i>Reoviridae</i>             | <i>Phytoreovirus</i>     | Rice gall dwarf virus                         | 66-67%  | 273   | 56-100% | 1035  | <i>Cecidomyiidae</i> |
|                               | <i>Dinovernavirus</i>    | Fako virus                                    | 61-100% | 19596 | 56-83%  | 366   | Mosquito             |
|                               |                          | <i>Aedes pseudoscutellaris</i> reovirus       | 69-100% | 5244  | -       | -     | -                    |
|                               | <i>Fijivirus</i>         | unclassified <i>Fijivirus</i>                 | 59-66%  | 432   | -       | -     | -                    |
|                               | unclassified             | Soudat virus                                  | 76-100% | 2093  | 67-100% | 1641  | <i>Drosophilidae</i> |
|                               |                          | Cimodo virus                                  | 98-100% | 372   | 70-100% | 1008  | <i>Culicidae</i>     |
|                               |                          | Grange virus                                  | 55-59%  | 396   | -       | -     | <i>Drosophilidae</i> |
|                               |                          | other unclassified <i>Reoviridae</i>          | -       | -     | 53-66%  | 795   | -                    |
| unclassified dsRNA<br>viruses |                          | <i>Rosellinia necatrix</i> fusagravirus 3     | -       | -     | 41%     | 49392 | Fungi                |
|                               |                          | <i>Colletotrichum acutatum</i> RNA virus 1    | -       | -     | 75-92%  | 1653  | Fungi                |

|                                     |                     |                                     |                                         |                                                         |         |         |         |             |                      |
|-------------------------------------|---------------------|-------------------------------------|-----------------------------------------|---------------------------------------------------------|---------|---------|---------|-------------|----------------------|
| <b>Unclassified<br/>RNA viruses</b> |                     |                                     |                                         | Hubei partiti-like virus 34                             | 68-100% | 2214913 | 55-100% | 1997449     | Gastropoda           |
|                                     |                     |                                     |                                         | Wenzhou sobemo-like virus 4                             | -       | -       | 94-98%  | 668852      | Mosquitoes           |
|                                     |                     |                                     |                                         | Hubei mosquito virus 2                                  | -       | -       | 37-85%  | 119667      | Arthropoda           |
|                                     |                     |                                     |                                         | Hubei picorna-like virus 61                             | 70-100% | 5815018 | 84-100% | 53578       | Mosquitoes           |
|                                     |                     |                                     |                                         | Hubei picorna-like virus 57                             | -       | -       | 72-100% | 45296       | Diptera              |
|                                     |                     |                                     |                                         | Hubei picorna-like virus 15                             | -       | -       | 58-100% | 40767       | Arthropoda           |
|                                     |                     |                                     |                                         | Hubei picorna-like virus 63                             | 55-100% | 986925  | -       | -           | Insecta              |
|                                     |                     |                                     |                                         | Hubei noda-like virus 11                                | 55-100% | 749763  | -       | -           | Arthropoda           |
|                                     |                     |                                     |                                         | Hubei picorna-like virus 62                             | 68-100% | 432814  | -       | -           | Arachnida            |
|                                     |                     |                                     |                                         | Beihai tombus-like virus 11                             | 41-71%  | 118730  | -       | -           | Actiniaria           |
|                                     |                     |                                     |                                         | Hubei picorna-like virus 60                             | 38-75%  | 144477  | -       | -           | Arthropoda           |
|                                     |                     |                                     |                                         | Hubei macula-like virus 2                               | 58-70%  | 116307  | -       | -           | Odonata              |
|                                     |                     |                                     |                                         | other unclassified RNA viruses                          | 34-100% | 414971  | 40-100% | 106752      | -                    |
| <b>ssDNA<br/>viruses</b>            | -                   | <i>Parvoviridae</i>                 | <i>Ambidensovirus</i>                   | Hymenopteran ambidensovirus 1                           | 51-60%  | 850     | -       | -           | Hymenoptera          |
|                                     |                     |                                     |                                         | Lepidopteran ambidensovirus 1                           | 51%     | 522     | -       | -           | Lepidoptera          |
|                                     |                     |                                     | unassigned <i>Ambidensovirus</i>        | 58-75%                                                  | 642     | -       | -       | -           |                      |
| <b>dsDNA<br/>viruses</b>            | <i>Caudovirales</i> | <i>Siphoviridae</i>                 | <i>Sextaecovirus</i>                    | <i>Staphylococcus</i> phage 6ec                         | 38%     | 126     | -       | -           | Bacteria             |
|                                     |                     |                                     |                                         | <i>Rhizobium</i> phage RHEph10                          | 40%     | 5827    | -       | -           | Fungi                |
|                                     | -                   | unclassified<br><i>Caudovirales</i> |                                         |                                                         |         |         |         |             |                      |
|                                     | -                   | <i>Poxviridae</i>                   | <i>Alphaentomopoxvirus</i>              | <i>Anomala cuprea</i> entomopoxvirus                    | 31%     | 2313    | -       | -           | Coleoptera           |
|                                     | -                   |                                     | <i>Betaentomopoxvirus</i>               | <i>Adoxophyes honmai</i> entomopoxvirus 'L'             | 43-73%  | 804     | -       | -           | Lepidoptera          |
|                                     | -                   | <i>Baculoviridae</i>                | <i>Alphabaculovirus</i>                 | <i>Lymantria xyliana</i> nucleopolyhedrovirus           | -       | -       | 60%     | 1107        | Lepidoptera          |
|                                     | -                   | <i>Hytrosaviridae</i>               | <i>Muscavirus</i>                       | <i>Musca domestica</i> salivary gland hypertrophy virus | -       | -       | 69%     | 706         | Muscidae             |
|                                     |                     |                                     |                                         | Tomelloso virus                                         | -       | -       | 64-70%  | 531         | <i>Drosophilidae</i> |
|                                     |                     |                                     | <i>Apis mellifera</i> filamentous virus | 55-100%                                                 | 452461  | 54-100% | 617009  | Hymenoptera |                      |
| <b>Unclassified<br/>viruses</b>     |                     |                                     |                                         | Daeseongdong virus 1                                    | 75-95%  | 614537  | -       | -           | <i>Culex</i> sp.     |
|                                     |                     |                                     |                                         | Dansoman virus                                          | -       | -       | 44%     | 4110        | <i>Drosophilidae</i> |
|                                     |                     |                                     |                                         | Tomato matilda virus                                    | 88-100% | 51998   | -       | -           | Plant                |
|                                     |                     |                                     |                                         | <i>Diabrotica virgifera virgifera</i> virus 1           | 41-66%  | 19503   | -       | -           | Coleoptera           |
|                                     |                     |                                     |                                         | Culicine-associated Z virus                             | 77-97%  | 14584   | -       | -           | <i>Culicinae</i> sp. |

|                                   |         |       |         |       |                      |
|-----------------------------------|---------|-------|---------|-------|----------------------|
| <i>Araticum</i> virus             | 70-85%  | 25767 | 69-92%  | 10435 | Plant                |
| Bloomfield virus                  | 52-100% | 7584  | 46-100% | 16825 | <i>Drosophilidae</i> |
| <i>Linepithema humile</i> virus 1 | -       | -     | 25-100% | 6134  | Hymenoptera          |
| Basavirus sp.                     | -       | -     | 44-55%  | 5979  | Vertebrate           |
| <i>Culex</i> luteo-like virus     | 42-67%  | 16686 | -       | -     | <i>Culex</i> sp.     |
| other unclassified viruses        | 50-100% | 6872  | -       | -     | -                    |

---
